# Supplementary material for: A Cas12a‐based gene editing system for Phytophthora infestans reveals monoallelic expression of an elicitor
Source: PubMed Central journal article supplement — Mol Plant Pathol. 2021 Mar 16;22(6):737–52. doi: 10.1111/mpp.13051 (PMC8126191; doi:10.1111/mpp.13051), 2021-03-16
Supplement: MPP-22-737-s002.pdf [file MPP-22-737-s002.pdf]

## Appendix S2. Guidelines for vector construction

----- PART A. Using pSTU-1 to express a single guide RNA: -----

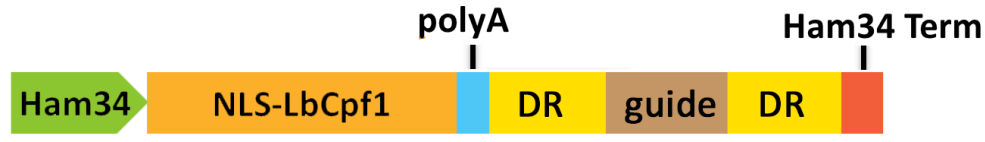

1. The final construct should look like the diagram shown above (the *nptII* expression cassette is not shown).
2. The starting plasmid, pSTU-1, contains the following:

***LbCpf1-stopcodon-PolyA-Bsal site-random sequence-Bsal site-DR***

3. To express a guide RNA of interest, the "random sequence" stuffer fragment is removed by *Bsal* digestion and replaced with a double-stranded dsDNA containing cohesive ends that will anneal with the *Bsal* sequences. This enzyme has the following recognition site:

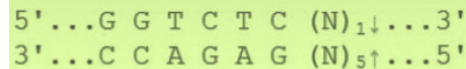

4. Only the DR close to the *Ham34* terminator is in the vector. Therefore, when designing oligonucleotides for cloning, a 5' DR must be included. The 5' DR and sgRNA are to be cloned in the *Bsal* site.
5. The next steps show how to clone this 23-nt guide RNA, which uses a TTTA PAM: TTTAATCAGTGCTCGACGGACTCCGGC (note that the PAM is not included in the sgRNA itself).
6. Two oligonucleotides should be annealed and ligated into *Bsal*-digested pSTU-1. When annealed, they should look like this:

```
5' - AAAATAATTTCTACTAAGTGATATCAGTGCTCGACGGACTCCGGC
3' -   ATTAAGATGATTCACATCTATAGTCACGAGCTGCCTGAGGCCGATTA
```

Blue: sticky ends for cloning into *Bsal*. Red: the 5' DR. Brown: the 23-mer sgRNA

and the two oligonucleotides would be:

Seq1F: 5' -**AAATAATTTCTACTAAGTGTAGATATCAGTGCTCGACGGACTCCGGC**

Seq1R: 5' -**ATTAGCCGGAGTCCGTCGAGCACTGATATCTACACTTAGTAGAAATTA**

7. If instead the goal was to express a sgRNA containing a 20-nt match to the genome sequence with 4 T's at the 3' end, the annealed oligos should look like this:

5' -**AAATAATTTCTACTAAGTGTAGATATCAGTGCTCGACGGACTCCTTTT**

3' - **ATTAAAGATGATTCACATCTATAGTCACGAGCTGCCTGAGGAAAAATTA**

----- PART B. Using pSTU-1 to express an array of guide RNAs: -----

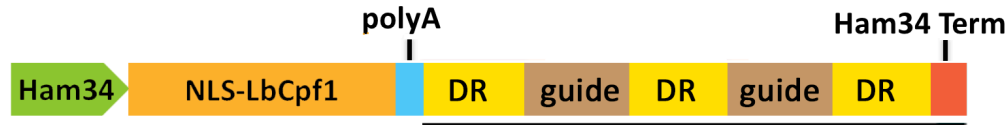

1. The final construct should look like the diagram shown above. It may also be possible to make much larger arrays, e.g. multiplexing three or more sgRNAs.

2. This example is for making an array of two 23-nt guide RNAs, each with a TTTV PAM

Target 1: TTTAATCAGTGCTCGACGGACTCCGGC

Target 2: TTTCGTGCTCTGTTCGCTGCCACCGTT

3. Only the DR close to the *Ham34* terminator is in the vector. Therefore, when designing oligonucleotides for cloning, a 5' DR must be included. The 5' DR, middle DR, and the two sgRNA regions are to be cloned in the *Bsal* site.

4. Two oligonucleotides should be annealed and ligated into *Bsal*-digested pSTU-1. When annealed, they should look like this:

```
5' - AAAATAATTTCTACTAAGTGTAGATATCAGTGCTCGACGGACTCCGGCTAATTTCTACTAAGTGTAGATGTGCTCTGTTCGCTGCCACCGTT
3' - ATTAAAGATGATTCACATCTATAGTCACGAGCTGCCTGAGGCCGATTAAGATGATTCACATCTACACGAGACAAGCGACGGTGGCAAATTA
```

Blue: for cloning into *Bsal*. Red: the two DR's. Brown: 23-mer sgRNA for target 1. Purple: 23-mer for target 2.

and the two oligonucleotides would be:

Seq2F : 5' - AAAATAATTTCTACTAAGTGTAGATATCAGTGCTCGACGGACTCCGGCTAATTTCTACTAAGTGTAGATGTGCTCTGTTCGCTGCCACCGTT

Seq2R : 5' - ATTAAACGGTGGCAGCGAACAGAGCACATCTACACTTAGTAGAAATTAGCCGGAGTCCGTCGAGCACTGATATCTACACTTAGTAGAAATTA
